# Supplementary material for: The centrosome orientation checkpoint is germline stem cell specific and operates prior to the spindle assembly checkpoint in Drosophila testis
Source: Oxford University Press journal article supplement (doi:10.1242/dev.117044), 2014-12-06
Supplement: dev117044supp.pdf [file dev117044supp.pdf]

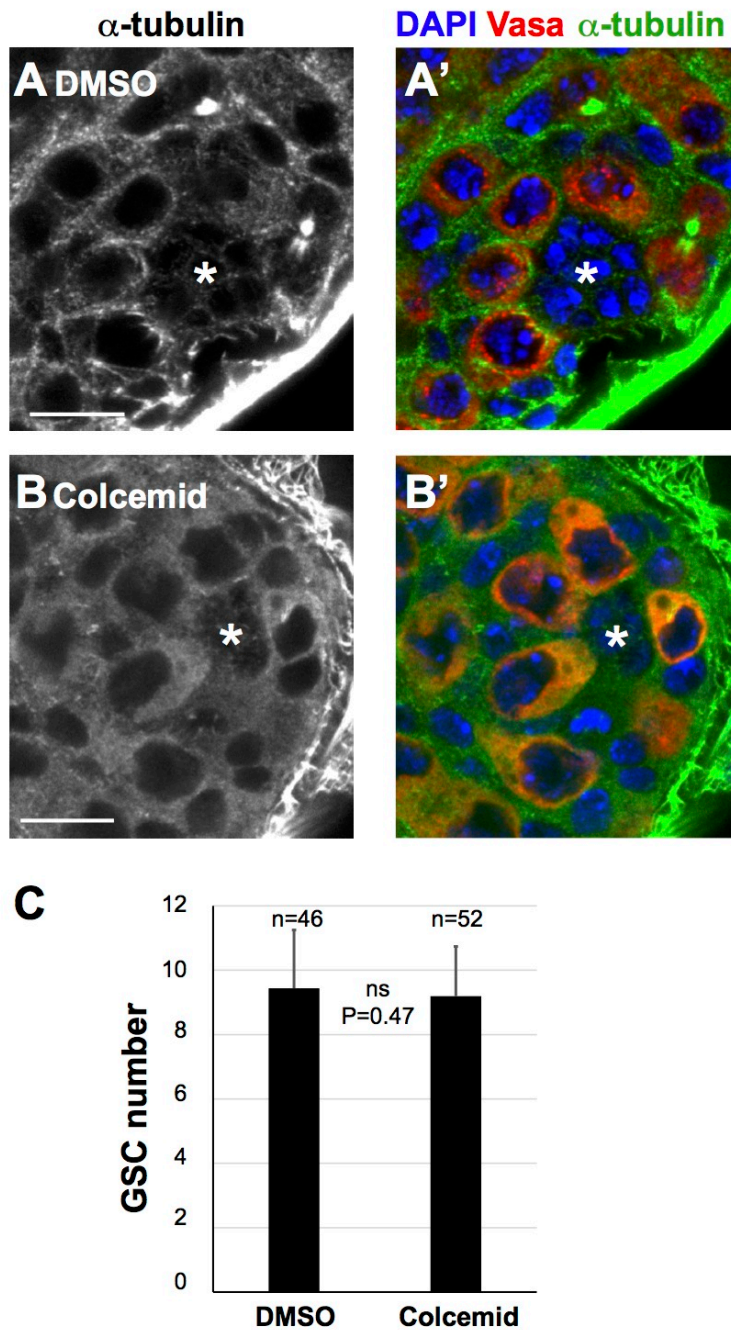

**Fig. S1. Effect of *ex vivo* colcemid treatment on adult testis.** Apical tip region of mock- (A) and colcemid- (B) treated testes after 1-hour incubation with DMSO or colcemid. (A', B') Images in (A) and (B), respectively, merged with images of Vasa and DAPI staining. Red: Vasa. Green:  $\alpha$ -tubulin. Blue: DAPI. Asterisks (\*) indicate the hub. Scale bars: 10  $\mu$ m. (C) GSC number per testis after *ex vivo* treatment with DMSO or colcemid for 6 hours. Error bar indicates s.d. P values were determined by two-tailed two-sample t-test..

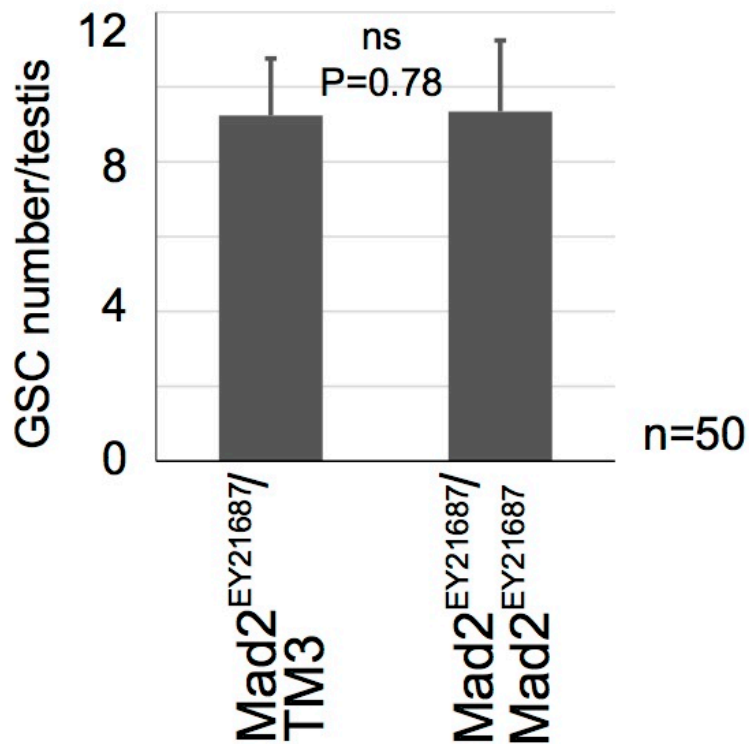

**Fig. S2. GSC number in *mad2* mutant adult testis.** GSC number per testis from *mad2* heterozygous and homozygous mutants. Error bar represents s.d.. P values were determined by two-tailed two-sample t-test.

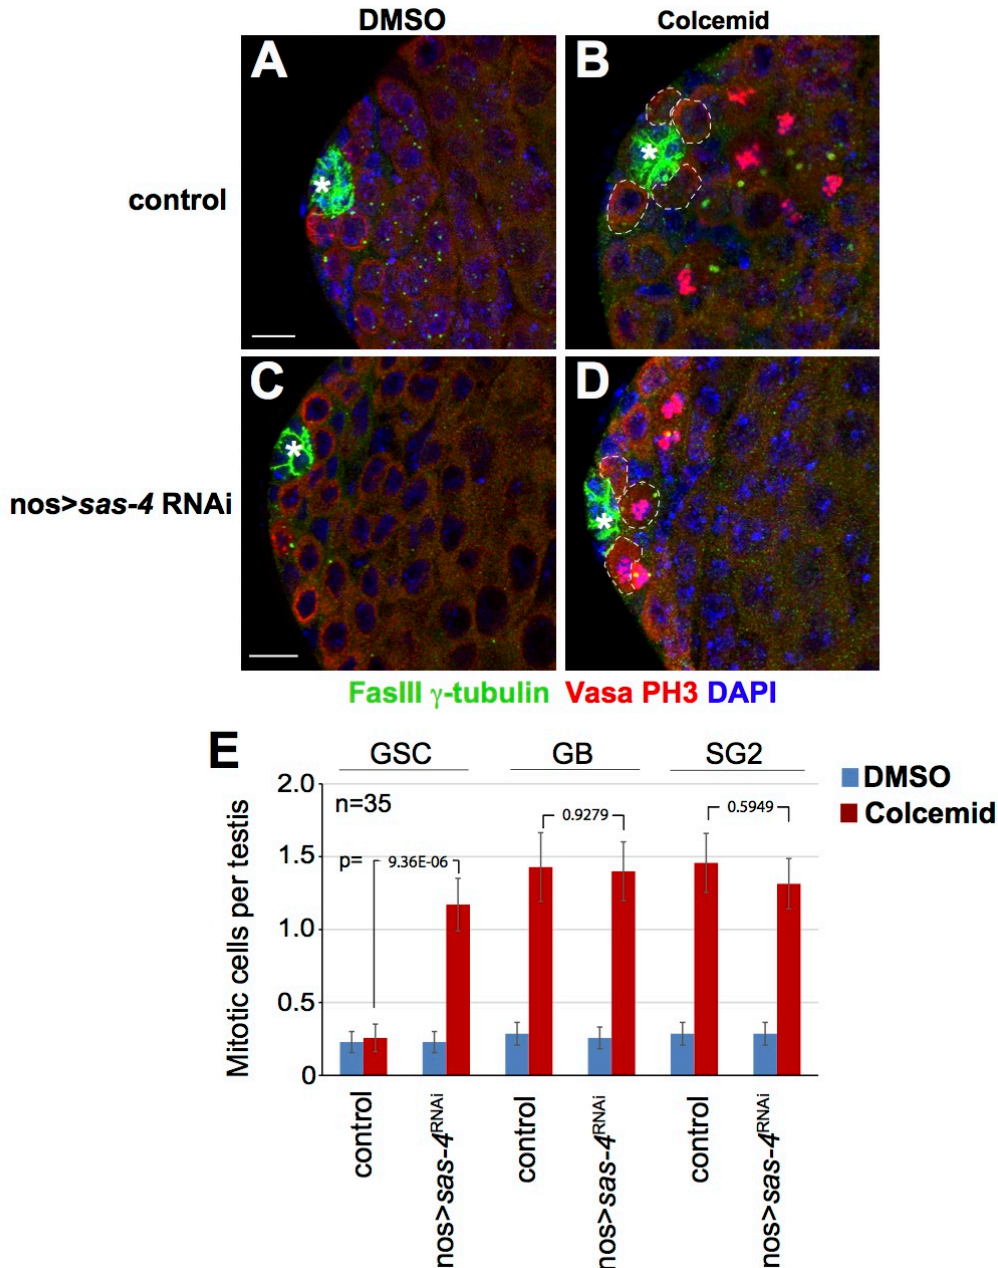

**Fig. S3. RNAi-mediated knockdown of *sas-4* in GSCs abolishes G2 arrest upon microtubule (MT) depolymerization.** (A-D) Examples of apical tip in mock-treated control (A), colcemid-treated control (B), mock-treated *nos-gal4>sas-4<sup>RNAi</sup>* (TRiP.HMS01463) (C), and colcemid-treated *nos-gal4>sas-4<sup>RNAi</sup>* testes after 4.5 hours. Red: Vasa, PH3. Green: FasIII,  $\gamma$ -tubulin. Blue: DAPI. Asterisks (\*) indicate the hub. Scale bars: 10  $\mu$ m. (E) Mitotic index of germline cells from control and *sas-4<sup>RNAi</sup>* adult testes after 4.5 hours of mock (DMSO) or colcemid treatment. Error bars indicate s.e.m. P values were determined by two-tailed two-sample t-test.
